# Supplementary material for: Imiquimod-Loaded Chitosan-Decorated Di-Block and Tri-Block Polymeric Nanoparticles Loaded In Situ Gel for the Management of Cervical Cancer
Source: MDPI journal article supplement (doi:10.3390/gels9090713), 2023-09-03
Supplement: s1 [file s1]

**Table S1.** Statistical significance between different treatment groups in Ca-Ski cells

| NPs Conc. (µg/mL)             | 0.78 | 1.56 | 3.125 | 6.25 | 12.5 | 25   | 50   | 100  |
|-------------------------------|------|------|-------|------|------|------|------|------|
| IMQ vs. CS-IMQ NPs            | ns   | **   | ns    | **** | **** | **** | **** | **** |
| <b>IMQ vs. IMQ NPs</b>        | ns   | ***  | ns    | **   | **** | **** | **** | **** |
| IMQ vs. CS-NPs                | ns   | ns   | ****  | **** | **** | **** | **** | **** |
| IMQ vs. NPs                   | ns   | ns   | ****  | **** | **** | **** | **** | **** |
| <b>CS-IMQ NPs vs. IMQ NPs</b> | ns   | ns   | ns    | ***  | **** | **** | **** | **** |
| CS-IMQ NPs vs. CS-NPs         | ns   | ***  | ****  | **** | **** | **** | **** | **** |
| CS-IMQ NPs vs. NPs            | ns   | **   | ****  | **** | **** | **** | **** | **** |
| <b>IMQ NPs vs. CS-NPs</b>     | *    | **** | ****  | **** | **** | **** | **** | **** |
| <b>IMQ NPs vs. NPs</b>        | *    | **** | ****  | **** | **** | **** | **** | **** |
| CS-NPs vs. NPs                | ns   | ns   | ns    | ns   | ***  | *    | ***  | **** |

*p*-values of < 0.05 were considered statistically significance, where \* *p* < 0.05, \*\* *p* < 0.005, \*\*\* *p* < 0.001, and \*\*\*\* *p* < 0.0001

**Table S2.** Statistical significance between different treatment groups in HeLa cells

| NPs Conc. (µg/mL)             | 0.78 | 1.56 | 3.125 | 6.25 | 12.5 | 25   | 50   | 100  |
|-------------------------------|------|------|-------|------|------|------|------|------|
| IMQ vs. CS-IMQ NPs            | ns   | ***  | ns    | ns   | ***  | ns   | ns   | ns   |
| <b>IMQ vs. IMQ NPs</b>        | ns   | **** | ****  | **** | **** | **** | **** | **** |
| IMQ vs. CS-NPs                | ns   | **   | ****  | **** | **** | **** | **** | **** |
| IMQ vs. NPs                   | ns   | ***  | ****  | **** | **** | **** | **** | **** |
| <b>CS-IMQ NPs vs. IMQ NPs</b> | ns   | **   | ****  | **** | **** | **** | **** | **** |
| CS-IMQ NPs vs. CS-NPs         | ns   | **** | ****  | **** | **** | **** | **** | **** |
| CS-IMQ NPs vs. NPs            | ns   | **** | ****  | **** | **** | **** | **** | **** |
| <b>IMQ NPs vs. CS-NPs</b>     | ns   | **** | ****  | **** | **** | **** | **** | **** |
| <b>IMQ NPs vs. NPs</b>        | ns   | **** | ****  | **** | **** | **** | **** | **** |
| CS-NPs vs. NPs                | ns   | ns   | ns    | ns   | ns   | ns   | ns   | ns   |

*p*-values of < 0.05 were considered statistically significance, where \* *p* < 0.05, \*\* *p* < 0.005, \*\*\* *p* < 0.001, and \*\*\*\* *p* < 0.0001

**Table S3.** Statistical significance between different treatment groups in C-33 A cells

| NPs Conc. (µg/mL)             | <b>0.78</b> | <b>1.56</b> | <b>3.125</b> | <b>6.25</b> | <b>12.5</b> | <b>25</b> | <b>50</b> | <b>100</b> |
|-------------------------------|-------------|-------------|--------------|-------------|-------------|-----------|-----------|------------|
| IMQ vs. CS-IMQ NPs            | ns          | ns          | ns           | ****        | ****        | ****      | ns        | *          |
| <b>IMQ vs. IMQ NPs</b>        | ns          | *           | ****         | ****        | ****        | ****      | ****      | ****       |
| IMQ vs. CS-NPs                | ns          | ns          | ****         | ****        | ****        | ****      | ****      | ****       |
| IMQ vs. NPs                   | ns          | ns          | ****         | ****        | ****        | ****      | ****      | ****       |
| <b>CS-IMQ NPs vs. IMQ NPs</b> | ns          | *           | ****         | ****        | ****        | ****      | ****      | ****       |
| CS-IMQ NPs vs. CS-NPs         | ns          | ns          | ****         | ****        | ****        | ****      | ****      | ****       |
| CS-IMQ NPs vs. NPs            | ns          | ns          | ****         | ****        | ****        | ****      | ****      | ****       |
| <b>IMQ NPs vs. CS-NPs</b>     | ns          | **          | ****         | ****        | ****        | ****      | ****      | ****       |
| <b>IMQ NPs vs. NPs</b>        | ns          | **          | ****         | ****        | ****        | ****      | ****      | ****       |
| CS-NPs vs. NPs                | ns          | ns          | ns           | ns          | ns          | ns        | ns        | ns         |

*p*-values of < 0.05 were considered statistically significance, where \* *p* < 0.05, \*\* *p* < 0.005, \*\*\* *p* < 0.001, and \*\*\*\* *p* < 0.0001

**Table S4.** Statistical significance between different treatment groups in VK/E6E7 cells

| NPs Conc. (µg/mL)             | <b>0.78</b> | <b>1.56</b> | <b>3.125</b> | <b>6.25</b> | <b>12.5</b> | <b>25</b> | <b>50</b> | <b>100</b> |
|-------------------------------|-------------|-------------|--------------|-------------|-------------|-----------|-----------|------------|
| IMQ vs. CS-IMQ NPs            | ns          | *           | ns           | ns          | *           | **        | ns        | ns         |
| <b>IMQ vs. IMQ NPs</b>        | ns          | ns          | ****         | ****        | ****        | ****      | ****      | ****       |
| IMQ vs. CS-NPs                | ns          | ****        | ****         | ****        | ****        | ****      | ****      | ****       |
| IMQ vs. NPs                   | ns          | ****        | ****         | ****        | ****        | ****      | ****      | ****       |
| <b>CS-IMQ NPs vs. IMQ NPs</b> | ns          | ns          | ****         | ****        | ****        | ****      | ****      | ****       |
| CS-IMQ NPs vs. CS-NPs         | ns          | ****        | ****         | ****        | ****        | ****      | ****      | ****       |
| CS-IMQ NPs vs. NPs            | ns          | ****        | ****         | ****        | ****        | ****      | ****      | ****       |
| <b>IMQ NPs vs. CS-NPs</b>     | ns          | ****        | ****         | ****        | ****        | ****      | ****      | ****       |
| <b>IMQ NPs vs. NPs</b>        | ns          | ****        | ****         | ****        | ****        | ****      | ****      | ****       |
| CS-NPs vs. NPs                | ns          | ns          | ns           | ns          | ***         | **        | ns        | ns         |

*p*-values of < 0.05 were considered statistically significance, where \* *p* < 0.05, \*\* *p* < 0.005, \*\*\* *p* < 0.001, and \*\*\*\* *p* < 0.0001
